# Supplementary material for: In Vitro and In Silico Approaches for the Antileishmanial Activity Evaluations of Actinomycins Isolated from Novel Streptomyces smyrnaeus Strain UKAQ_23
Source: MDPI journal article supplement (doi:10.3390/antibiotics10080887), 2021-07-21
Supplement: s1 [file s1]

# *In Vitro* and *In Silico* Approaches for the Antileishmanial Activity Evaluations of Actinomycins Isolated from Novel *Streptomyces smyrnaeus* Strain UKAQ\_23

Kamal A. Qureshi <sup>1,2</sup>, Ibrahim Al Nasr <sup>3,4</sup>, Waleed S Koko <sup>4</sup>, Tariq A Khan <sup>5</sup>, M. Qaiser Fatmi <sup>6</sup>, Mahrukh Imtiaz <sup>6</sup>, Riaz A Khan <sup>7</sup>, Hamdoon A Mohammed <sup>7</sup>, Mariusz Jaremko <sup>8</sup>, Abdul-Hamid Emwas <sup>9</sup>, Faizul Azam <sup>10,\*</sup>, Avinash D. Bholay <sup>11</sup>, Gamal O. Elhassan <sup>2</sup> and Dinesh K. Prajapati <sup>1,\*</sup>

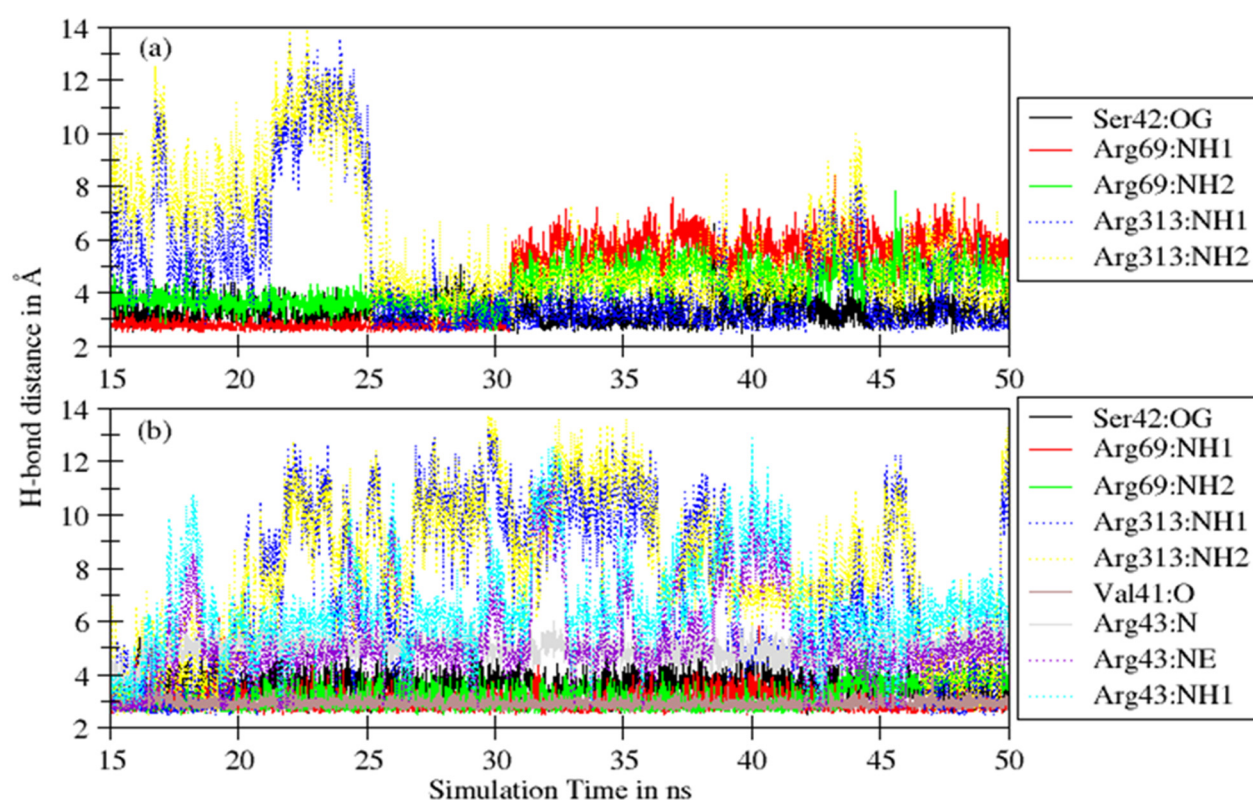

**Figure S1.** H-bond distances calculated between heavy atoms of protein (*i.e.*, O or N) and ligand (*i.e.*, O or N) for (a) actinomycin D and (b) actinomycin X<sub>2</sub> complexes. The hydrogen bonds were calculated using VMD, where the cutoff for Donor-Acceptor distance and angle was set to 3 Å and 20 degrees, respectively.

**Table S1.** The selected proteins for molecular docking studies with actinomycin D and actinomycin X<sub>2</sub> ligands targeting multiple pathways in *Leishmania major*. The table also lists the name of enzymes, their FASTA sequence, amino acid length, their PDB code (if existed) or models (generated from homology modeling approach or threading approach), and the corresponding pathways where the protein is involved.

| Enzyme                           | Organism                   | FASTA                                                                                                                                                                                                                                                                                                                                                                                                                                                                                                                                                                                                                                                                                                                                                             | Amino acid | PDB/Model | Pathway               |
|----------------------------------|----------------------------|-------------------------------------------------------------------------------------------------------------------------------------------------------------------------------------------------------------------------------------------------------------------------------------------------------------------------------------------------------------------------------------------------------------------------------------------------------------------------------------------------------------------------------------------------------------------------------------------------------------------------------------------------------------------------------------------------------------------------------------------------------------------|------------|-----------|-----------------------|
| Trypanothione reductase          | <i>Leishmania infantum</i> | MGSSHHHHHHSSGLVPRGSHMSRAYDLV<br>VLGAGSGGLEAGWNAAVTHKKKAVVD<br>VQATHGPPLFAALGGTCVNVGCVPKKLM<br>VTGAQYMDLIRESGGFGWEMDRESLCPN<br>WKTLLAAKNKVNSINESYKSMFADTEGL<br>SFHMGFGALQDAHTVVVRKSEDPHSDVL<br>ETLDTEYLIIATGSWPTRLGVPGDEFCTSN<br>EAFYLEDAPKRMLCVGGGYIAVEFAGIFN<br>GYKPCGGYVDLCYRGDLILRGFDTEVRKS<br>LTKQLGANGIRVRTNLNPTKITKNEDGSN<br>HVHFNDGTEEDYDQVMLAIGRVPRSQAL<br>QLDKAGVRTGKNGAVQVDAYSKTSVDNI<br>YAIGDVTNRVMLTPVAINEGAAPVETVFG<br>GKPRATDHTKVACAVFSIPPITCGMTEEE<br>AAKNYETVAVYASSFTPLMHNISGSKHKE<br>FMIRIITNESNGEVLGVHMLGDSAPETIQSV<br>GICMKMGAKISDFHSTIGVHPTSAEELCS<br>MRTPAYFYESGKRVEKLSSNL                                                                                                                                                                   | 511        | 2JK6      | Trypanothione pathway |
| Trypanothione synthetase-amidase | <i>Leishmania major</i>    | MSSLQRASVSFNKPGHIPFAGVQGYAPGG<br>VPAYSNKHDHYFSGERNIEDNIFGFKYQ<br>CVEFARRWLLVRKGLLLPDVNWACHIFQ<br>LKEVRDAATTESFAVLQVRNGTTTKPEAD<br>ALLVYPSTDANPVGHVGTITEVGDDYVCV<br>ADQNYRFHKWESSCAYKLLDHRDGIWT<br>IIDDIDADEIEIPLGWLTFPGRANRPEGAPP<br>VALHPSLHFKEPPKPYLLRRNFLPTESKAN<br>WLDNMNPAERLFVEEFGMDVSRTRLEEK<br>VVSYYESNHEFHLRCVAYGTQLHAIFMEA<br>TAQVIESDEKLRLFAIPEEFWPRIRHSWKY<br>QQTYISGRFDFAFNNETGEVKCFEYNADS<br>ASTLLECGLIQQKWAESVGLDKQDTRGSG<br>FAVERNLMKAWANSATGRVHFCVDEE<br>REEQYTALYCMQAAEAVGLEGLCLIFDE<br>FRFDDNGHVVDSDGVRVRNVWKTWMW<br>ESAITDYAAAREERGENWKPSPKDKVRLC<br>DLLLGDDWEILYFPMWKVIPSNAKILPMI<br>YHNHPEHPAILKAEYELTDELKHHGYAK<br>KPIVGRVGSNVIITSGDGVVHAESGGKYG<br>KRNMIYQQFLFELKKQDDYYAIIIGGWMIG<br>DAFSGTGIREDKSVITGVDSPFAAVRIKTD<br>KLPHPVTLKDIDKMAEDE | 652        | 2VOB      | Trypanothione pathway |
| Tryparedoxin peroxidase          | <i>Leishmania major</i>    | MSCGNAKINSPAPSFEEVALMPNGSFKKIS<br>LSSYKGKVVVLFYPLDFTFCPTFVIAFS<br>DSVSRFNELNCEVLACSIDSEYAHLQWTL<br>QDRKKGGLGTMAIPMLADKTKSIARSYGV                                                                                                                                                                                                                                                                                                                                                                                                                                                                                                                                                                                                                                  | 199        | 4K1F      | Trypanothione pathway |

|                                       |                             |                                                                                                                                                                                                                                                                                                                                                                                                                                                                                                                                                                                                                                                                     |     |                                                                                                                                         |                                   |
|---------------------------------------|-----------------------------|---------------------------------------------------------------------------------------------------------------------------------------------------------------------------------------------------------------------------------------------------------------------------------------------------------------------------------------------------------------------------------------------------------------------------------------------------------------------------------------------------------------------------------------------------------------------------------------------------------------------------------------------------------------------|-----|-----------------------------------------------------------------------------------------------------------------------------------------|-----------------------------------|
|                                       |                             | LEESQGVAYRGLFIIDPHGMLRQITVNDM<br>PVGRSVEEVLRLLEAFQFVEKHGEVCPAN<br>WKKGAPTMMKPEPNASVEGYFSKQ                                                                                                                                                                                                                                                                                                                                                                                                                                                                                                                                                                          |     |                                                                                                                                         |                                   |
| Squalene syn-<br>thase                | <i>Leishmania<br/>major</i> | MGFFSDSVAMMRVKWQMRSVKIQVPPEE<br>TDLRFCYDIMNDVSRFAVVVAQLADQQ<br>LRDAICIFYLVLRALDTLEDDMSVPVDVKL<br>KELPKFHTHTSDMSWCMSGVGEGREREL<br>LAKYPCVSREFKKLKKEYQDVIANICERM<br>ANGMCEFLKRPVVTKDDYNQYCHYVAG<br>LVGHGLTQLFARCGFEDPSLDDDLTSSNH<br>MGLFLQKTNIIRDYYEDIREPPRMFWPKE<br>IWGTYVTELKELKSESNNAAVQCLNAM<br>VADALVHVPYIVDYLALRDPVFRFCAIP<br>QVMAIATLKEVYNNPDFTQVKVKVSRPES<br>CRIMLKATTLYSSLSMFRDYCVELQEKLD<br>MQDASSVSIANSALAAIERIDLQLKKCQD<br>VSYTRSLARYPGLGGQFLLTVMMDTVAGF<br>FGGRKEIAGHA                                                                                                                                                                                   | 414 | Swiss Model<br>( <b>Template<br/>used:</b><br>3wca.pdb<br><b>Query<br/>Coverage:</b><br>82%<br><b>Sequence<br/>Identity:</b><br>61.83%) | Sterol<br>biosynthetic<br>pathway |
| Squalene<br>monooxygenase             | <i>Leishmania<br/>major</i> | MLYFFAAVLCAVSTLLLLNRTLRLRLSPA<br>RTSYDYDVIIVGGSAGPVLAKALSDQGRK<br>VLMVERTLFTKPDRIVGELLQPGGLNALK<br>EVGMKECAETIGMPCHGYVVVDHKGKQ<br>VDLPYRKGAAGVSFHFQDFVQSLRSHVFH<br>NCKANVTMVEGTVNILTEGLSFSERAYG<br>VEYTIAEKYEVPTKPFREDPPKTNPVAATV<br>RKVATAPLVVMCDGGMSKWSRYQHYT<br>PAYEYHSHFIGLVLKTIVRLPKEQRTVFFG<br>KTGPILSYRLDDNELRLLDVYNKPTLPSLE<br>KQSEWLIQDVAPCLPENMREQFVRVSKDT<br>KSLRSMPMARYPPAFPSIKGYVGIGDHAN<br>QRHPLTGGGMTCCFRDAIRLANSLNGIQS<br>LRSVNQEEMAAIEDKIQAAILNYARYRYT<br>HSCCINLLSWALYSVFSSPALRDACFDYFL<br>CGGNCVGTGPMDLLAGLDPNVGSLFFHYC<br>CVMLHGVANVMMRTGAYSESGKQLSNL<br>EKLTNVASFFVDWERMKHAAYLLGKSTQI<br>ALPLAKSEFYSMWRFVDPTSPLANISKRIK<br>TMVYTKQFNGKQQRKPVGL | 569 | I-Tasser<br>(Various<br>templates<br>were used<br>including:<br>6c6n.pdb,<br>6fho.pdb,<br>6c6r.pdb)                                     | Sterol<br>biosynthetic<br>pathway |
| Farnesyl<br>pyrophosphate<br>synthase | <i>Leishmania<br/>major</i> | MAHMERFQKVYEEVQEFLGDAEKRFEM<br>DVHRKGYLKSMMDDTTCLGGKYNRGLCV<br>VDVAEAMAKDTQMDAAAMERVLHDAC<br>VCGWMIEMLAHFLVEDDIMDHSKTRRG<br>KPCWYLHPGVTAQVAINDGLILLAWATQ<br>MALHYFADRPFLAEVLRVFDVLDLTTIG<br>QLYDVTSMVDSAKLDAKVAHANTTDYVE<br>YTPFNHRRIVVYKTAYTYWLPLVMGLLV<br>SGTLEKVDKKATHKVAMVMGEYFQVQD<br>DVMDCTPPEKLGKIGTDIEDAKCSWLAV<br>TFLTAPAEKVAEFKANYGSTDPAAVAVI<br>KQLYTEQNLLARFEEYEKAVVAEVEQLIA<br>ALEAQNAFAASVKVLWSKTYKRQK                                                                                                                                                                                                                                                | 362 | 4JZX                                                                                                                                    | Sterol<br>biosynthetic<br>pathway |

|                                          |                         |                                                                                                                                                                                                                                                                                                                                                                                                                                                                                                                                                               |     |                                                                                                                              |                    |
|------------------------------------------|-------------------------|---------------------------------------------------------------------------------------------------------------------------------------------------------------------------------------------------------------------------------------------------------------------------------------------------------------------------------------------------------------------------------------------------------------------------------------------------------------------------------------------------------------------------------------------------------------|-----|------------------------------------------------------------------------------------------------------------------------------|--------------------|
| Glyceraldehyde-3-phosphate dehydrogenase | <i>Leishmania major</i> | MAPIKVGINGFGRIGRMVLQAICDQGLIG<br>NEIDVVAVVDMSTNAEYFAYQMKYDTV<br>HGRPKYTVEAVKSTPSVKTPDVLVNGHR<br>IKCVKAQRNPADLPWGKLGVDYVIESTGL<br>FTDKLQAEGLHKGGAKKVVISAPASGGAK<br>TIVMGVNQHEYSPTSHHVSNASCTTNCL<br>APIVHVLTKENFGIETGLMTTIHSYTATQK<br>TVDGVSLKDWRGRAAAINIIPSTTGAAG<br>AVGMVIPSTKGKLTGMSFRVPTPDVSVVD<br>LTFRSTRETSIQEIDKAIKKAQTYMKDILG<br>FTNDELVSDFINDNRSSVYDSKATLQNN<br>LPGEKRFFKIVSWYDNEWGYSHRVVDLVR<br>YMAATDAASAKM                                                                                                                                          | 361 | Swiss Model<br>( <b>Template used:</b><br>1gyq.pdb<br><b>Query Coverage:</b><br>99%<br><b>Sequence Identity:</b><br>94.69%)  | Glycolytic pathway |
| Triosephosphate isomerase                | <i>Leishmania major</i> | MSAKPQPIAAANWKCNGTTASIEKLQVQ<br>LNEHNISHDVQCVVAPTFFVHIPLVQAKLR<br>NPKYVVSNAENAIKSGAFTGEVSMPIKLD<br>LGINWVILGHSEERTYYGETDETVAQKVA<br>DACKQGFMIACIGETLQQREANQTAKV<br>VLSQTSIAITKLPKEAWDQIVLAYEPVWA<br>IGTGKVATPEQAQEVHALLRKWVSEKIGT<br>DVAAKLRILYGGSVSAGNAKTLYMKPDIN<br>GFLVGGASLKPEFRDIIDATR                                                                                                                                                                                                                                                                   | 251 | Swiss Model<br>( <b>Template used:</b><br>5cg7.pdb<br><b>Query Coverage:</b><br>100%<br><b>Sequence Identity:</b><br>91.63%) | Glycolytic pathway |
| Phosphoglycerate kinase                  | <i>Leishmania major</i> | MSLVLKKSIDDATVRDKKVLIRVDFNVVP<br>KNGKITNDFRISALPTIQKVLKEGGSCIL<br>MSHLGRPKGARMSPSPKGVGRGYEEAA<br>TLRPVAARIAELLGQKVEFAPDCLDAAAY<br>ASKLKNGDVLLLENVRFYAEESGSKKEEER<br>DAMAKVLAASYADLYVSDAFGTAHRDSAT<br>MTGIPKVLGAGYAGYLMEKEINYFSRVLN<br>NPPRPLVAIVGGAKVSDKIELLDNMLSRIN<br>YLVIGGAMAYTFQKAQGRKIGISMCEEDK<br>LDLAKSLLKKAQERGVQVFLPVDHVCNK<br>EFKAADSPLVTEVDVDPGYMALDIGPRTI<br>HMYEEVIGRCKSAIWNGPMGVFEMPCYS<br>KGTFAVAKAMGTGTQKNGLLSIIGGDS<br>ASAAELSGEAKNMSHVSTGGGASLELLEG<br>KTLPGVAILTDKDVKERGASCRFAFGVGS<br>PSREACPLRCGHIFGGASIVREIVKLVVALL<br>IGIFIGRRMSTKLIR | 479 | Swiss Model<br>( <b>Template used:</b><br>16pk.pdb<br><b>Query Coverage:</b><br>86%<br><b>Sequence Identity:</b><br>73.39%)  | Glycolytic pathway |
| Pyruvate kinase                          | <i>Leishmania major</i> | MSQLAHNLTLSIFEPVANHRATRIVCTIGP<br>STQSVEALKGLIQSGMSVARMNFSHGSHE<br>YHQTINNVRQAAAELGVNIAIALDTKGP<br>EIRTGQFVGGEAVMERGATCYVTTDPAFA<br>DKGTKDKFYIDYQNLKSVVRPGSYIYIDDG<br>ILILHVQSHEDQTLKCTVNAHTISDRRG<br>VNLPGCDVDLPAVSAKDCADLQFGVEQG<br>VDMIFASFIRSAEQVDVRKALGAKGHDI<br>MIICKIENHQGVQNIDSIIIESDGIMVARG<br>DLGVEIPAEEKVVAQKILISKCNVAGKPIV<br>CATQMLESMTYNPRPTRAEVSDVANAVF<br>NGADCVMLSGETAKGKYPNEVVQYMARI                                                                                                                                                        | 499 | Swiss Model<br>( <b>Template used:</b><br>3hqn.pdb<br><b>Query Coverage:</b><br>100%<br><b>Sequence Identity:</b><br>95.59%) | Glycolytic pathway |

|                                                              |                         |                                                                                                                                                                                                                                                                                                                                                                                                                                                                                                                                                                                                                                                  |     |                                                                                                                              |                        |
|--------------------------------------------------------------|-------------------------|--------------------------------------------------------------------------------------------------------------------------------------------------------------------------------------------------------------------------------------------------------------------------------------------------------------------------------------------------------------------------------------------------------------------------------------------------------------------------------------------------------------------------------------------------------------------------------------------------------------------------------------------------|-----|------------------------------------------------------------------------------------------------------------------------------|------------------------|
|                                                              |                         | CLEAQSAVNEYVFFNSIKKLQPIPMASAEAA<br>VCSSAVNSVYETKAKVMVLSNTGRSARL<br>VAKYRPNCPIVCVTTRLQTCRQLNITQGV<br>ESVFFDAEKLGHDEGKEQRVAMGVGFAK<br>SKGYVQTGDYSVVIHADHKVKGYANQTR<br>ILLVE                                                                                                                                                                                                                                                                                                                                                                                                                                                                        |     |                                                                                                                              |                        |
| Phosphoglycerate mutase (2,3-diphosphoglycerate-independent) | <i>Leishmania major</i> | MSNLLLRPHKDLPRRKLIVVMDGLGIGP<br>EDEYDAVHMASTPFMDAQRQNSRHFRSV<br>RAHGTAUGLPTDADMGNSEVGHNALGA<br>GRVALQGASLVDDALKSGEITYTGEGYRYL<br>LGAFTEKESTLHLIGLLSDGGVHSRDNQI<br>HSIIHAAKNGAKGIRVHVLYDGRDVPDG<br>SSFRFTELEAVLARVRQDGCDAAIASGG<br>GRMFVTMDRYDADWSIVERGWKAQVLG<br>DARHFHSAKEAITTFREEDPKVTDQYPPF<br>VVVDEQKPLGTIEDGDAVLCVNFGRDR<br>VIEMTRAFEDDFDKFDRVRVPKVRYAG<br>MMRYDGDGLGIPNNFLVPPPKLTRVSEYL<br>CGTGLQIFACSETQKFGHVTYFWNGNRSG<br>KVDEEHETFKEVPSDRVHFNEQPKMKSAE<br>ITEAAIEALKSGMYDVVRINFPNGDMVGH<br>TGDLRATIAGVEAVDESLAKLKDAVDSIN<br>GVFIVTADHGNSDDMAQRDKKKGPMKD<br>EKGNVPLTSLTSLSPVPVFIGGAGLDPRVA<br>MRTDLPTAGLANVTATFINLLGFEAPEDY<br>EPSLIFVEN | 553 | Swiss Model<br>( <b>Template used:</b><br>3igy.pdb<br><b>Query Coverage:</b><br>100%<br><b>Sequence Identity:</b><br>92.21%) | Glycolytic pathway     |
| Fructose-bisphosphate aldolase                               | <i>Leishmania major</i> | MSRVTFQSQLPACNRIKTPYEELIATVKK<br>LTPGKGLLAADESIGSCTKRFEPGLSNT<br>EHRRQYRALMLEAEGLEQYISGVILHDET<br>VSQKASNGKTFPEYLARGVVPGIKTDMG<br>LCPLLEGAEGEQMTEGLDGYVKRASVYYK<br>KGCRCCKWRNVYKIQNGTVSEPAVRFNA<br>ETLARYAILSQMSGLVPIVEPEVMIDGKHD<br>IDTCQRVSEHVWREVVAALQRHGVWEG<br>CLLKPNMVVPGAESQTAAPQVAHYTV<br>MTLARTMPAMLPGVMFLSGGLSEVQASE<br>YLNAINNSPLPRPYFLSFSYARALQSSALK<br>AWGGKDSGVAAGRRFLHRARMNSMA<br>QLGKYKRADDDASSSSLYVKGNLY                                                                                                                                                                                                                        | 371 | Swiss Model<br>( <b>Template used:</b><br>2qap.pdb<br><b>Query Coverage:</b><br>100%<br><b>Sequence Identity:</b><br>95.96%) | Glycolytic pathway     |
| Adenine phosphoribosyltransferase                            | <i>Leishmania major</i> | MSFKEISPNSFLLEDSPHLSQLLKKNYC<br>SPVFSRPNVPRFADVSSITESPETLKAIRDFL<br>VQRYRTMSPAPTHILGFDARGFLFGPMIA<br>VELGIPFVLMRKADKNAGLLIRSEPYEKEY<br>KEAAPEVMTIRYGSISKGSRVVLIDDLAT<br>GGTALSGLQLVEASDAMVVEMVSILCIPFL<br>KAAEKIHSTGHSRYKDIKFISLLSEEALTED<br>NCGDSKNYTGPRVVSCGDVLSKHSQ                                                                                                                                                                                                                                                                                                                                                                           | 237 | Swiss Model<br>( <b>Template used:</b><br>1qb7.pdb<br><b>Query Coverage:</b><br>98%<br><b>Sequence Identity:</b><br>92.27%)  | Purine salvage pathway |
| Xanthine phosphoribosyltransferase                           | <i>Leishmania major</i> | MLPNHSCCKGFVDAQGRVFDGREYPMAS<br>GIVATEDVIQANIKAMANTIAKDYKSLSH<br>RDVRLSPGTAATAEAAEAPISYDNPLIISV                                                                                                                                                                                                                                                                                                                                                                                                                                                                                                                                                  | 238 | Swiss Model                                                                                                                  | Purine salvage pathway |

|                              |                             |                                                                                                                                                                                                                                                                                                                                                                                 |     |                                                                                                 |                                     |
|------------------------------|-----------------------------|---------------------------------------------------------------------------------------------------------------------------------------------------------------------------------------------------------------------------------------------------------------------------------------------------------------------------------------------------------------------------------|-----|-------------------------------------------------------------------------------------------------|-------------------------------------|
|                              |                             | LKGSYIFTSDFIRYLGDCGLPHVDFVRLA<br>SYNSDTTSTGQISMLAGLRFENLRGKHVLI<br>VEDVCDSGRTLRLRDYIMEKFQPKSVKTL<br>VMVNKEQAARKLDFDPEYFCLAGPNKYI<br>VGYGFEVNDRYRDLRHIFILRDGEATRYP<br>AKL                                                                                                                                                                                                        |     | (Template<br>used:<br>6mxc.pdb<br>Query<br>Coverage:<br>92%<br>Sequence<br>Identity:<br>56.36%) |                                     |
| Deoxyhypusine<br>Hydroxylase | <i>Leishmania<br/>major</i> | MSASNSCTVEEVKEYAKLLDPQEPLDSR<br>MRELYRLKEDCLKTVAGVTVILEAIDTTDS<br>VLLQHELAYNAGQSGREEAVPELERILRTT<br>SYDVVTRHEAAEALGAIGSPLALQVLETH<br>SAPTTEPEASIRETCELALARIAMKETKGD<br>AAVAPPSGCEFVSVDPSAFSALYSSTDEP<br>VPLTVEELEAVLLDTSGRTRLFRRYMAMF<br>TLRNLATEAAVAALCRGLREDTISALFRH<br>EVAFVLGQLERPSSQPALIAALKDEEEAP<br>MVRHEAAEALGAIADPATLPVLESYATH<br>HEPIVRDSCVVALEMHKYWAHFNSLAHQ<br>QQEA | 325 | I-Tasser<br>(Various<br>templates<br>were used<br>including:<br>4d4z.pdb,<br>6fsq.pdb)          | Hypusine<br>biosynthetic<br>pathway |
